# Supplementary material
Source: Springer Nature journal article supplement (https://www.springermedizin.de/resource/supplementary/12889_2012_3965_MOESM4_ESM.PDF/9491060)
Supplement: MOESM4 [file 9491060]

Additional file 4. Summary of behavioural goals, determinants addressed, and strategies used in the social network meetings of *PTWD*

| <b>Behavioural goals</b>                                                                                                                                        | <b>Determinants addressed</b> | <b>Strategies (programme components)</b>                                                                 |
|-----------------------------------------------------------------------------------------------------------------------------------------------------------------|-------------------------------|----------------------------------------------------------------------------------------------------------|
| SO and diabetic patient together identify the diabetic patient's obstacles for DSM (monitoring of blood glucose, medication adherence, diet, physical activity) | Awareness of barriers         | Exchange of experiences and thoughts on DSM<br>Discussion of the diabetic patient's personal action plan |
| SO and diabetic patient together make a plan to overcome these obstacles                                                                                        | Problem-solving skills        | Group discussion<br>Participatory problem-solving<br>Guided feedback from group leader                   |
| SO and diabetic patient execute the plan they made together                                                                                                     | Collective self-efficacy      | Homework assignment followed by feedback                                                                 |
| SO and diabetic patient evaluate the plan and make adjustments if necessary                                                                                     | Collective self-efficacy      | Giving each other positive feedback<br>Guided feedback from group leader                                 |
|                                                                                                                                                                 | Problem-solving skills        | Group discussion<br>Participatory problem-solving<br>Guided feedback from group leader                   |

DSM: diabetes self-management

SO: significant other
